# Supplementary material for: TROP2 promotes proliferation, migration and metastasis of gallbladder cancer cells by regulating PI3K/AKT pathway and inducing EMT
Source: PubMed Central journal article supplement (PMC5564543; doi:10.18632/oncotarget.16789), 2017-04-03
Supplement: oncotarget-08-47052-s001.pdf [file oncotarget-08-47052-s001.pdf]

## TROP2 promotes proliferation, migration and metastasis of gallbladder cancer cells by regulating PI3K/AKT pathway and inducing EMT

### SUPPLEMENTARY FIGURES AND TABLES

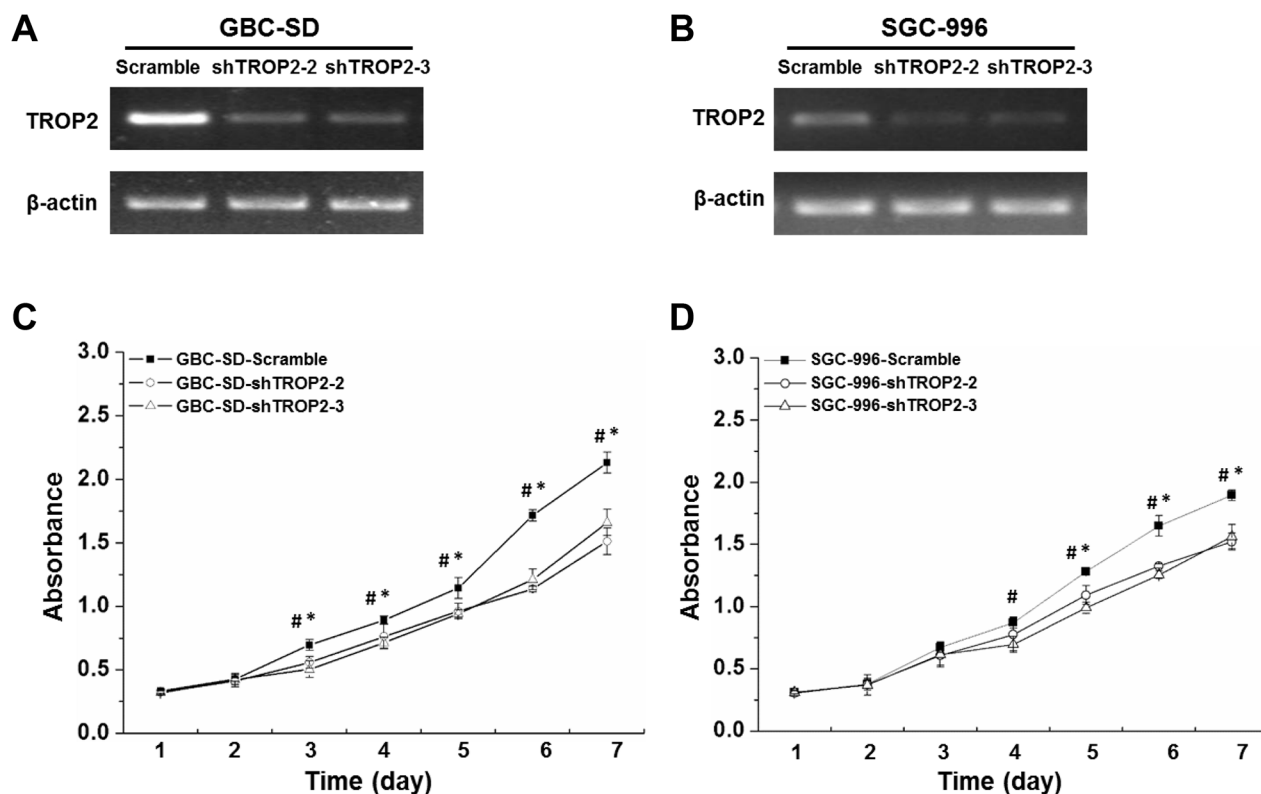

**Supplementary Figure 1: TROP2 knockdown using another two sh-RNAs.** (A and B) TROP2 mRNA expression of GBC-SD and SGC-996 cells after RNA interference using shTROP2-2 and shTROP2-3. Cells were transfected with scramble sh-RNA as negative controls. Each experiment was repeated three times. (C and D) Growth curves of GBC-SD and SGC-996 cells after RNA interference using shTROP2-2 and shTROP2-3. Graphs, mean of three experiments; bars, S.D. \* $P < 0.05$ , shTROP2-2 group compared with the control group. # $P < 0.05$ , shTROP2-3 group compared with the control group.

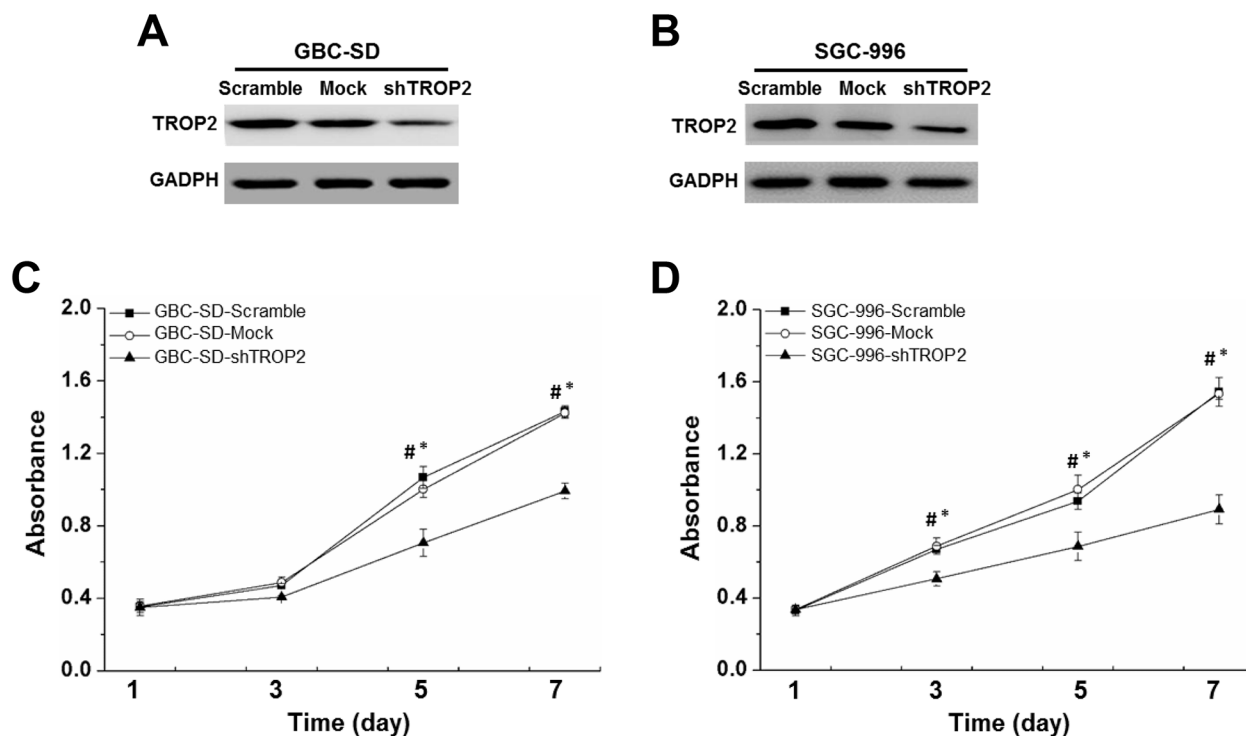

**Supplementary Figure 2: Effects of empty vector on proliferation of GBC-SD and SGC-996 cells.** (A and B) TROP2 protein expression of GBC-SD and SGC-996 cells after empty vector transfection. Cells were transfected with shTROP2 as positive controls. Each experiment was repeated three times. (C and D) Growth curves of GBC-SD and SGC-996 cells after empty vector transfection. Graphs, mean of three experiments; bars, S.D. \* $P < 0.05$ , empty vector group compared with the positive control group. # $P < 0.05$ , scramble group compared with the control group.

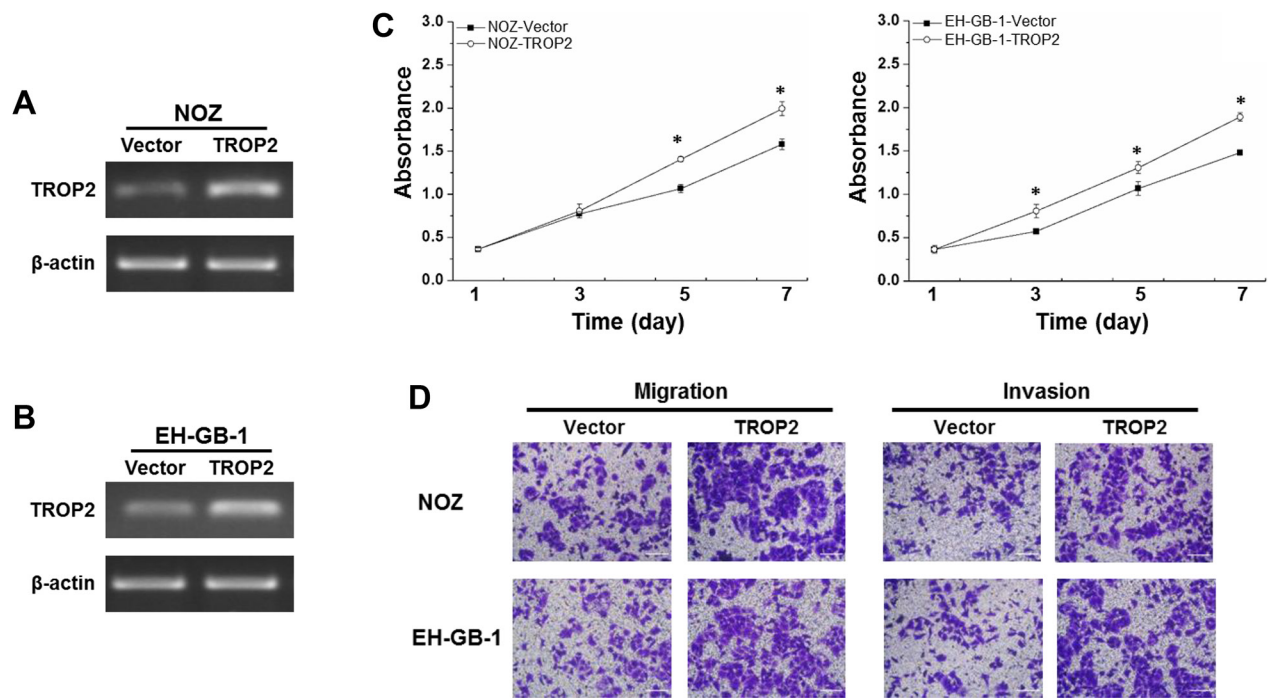

**Supplementary Figure 3: Effects of TROP2 on proliferation, migration and invasion of NOZ and EH-GB-1 cells. (A and B)** TROP2 mRNA expression of NOZ and EH-GB-1 cells after plasmid transfection. Cells were transfected with empty vector as negative controls. **(C)** Growth curves of NOZ and EH-GB-1 cells after plasmid transfection. Graphs, mean of three experiments; bars, S.D.  $*P < 0.05$ , compared with the control group. **(D)** Microscope images of NOZ and EH-GB-1 cell migration and invasion after TROP2 overexpression. Each experiment was repeated three times.

Supplementary Table 1: Primer pairs

## Primer pairs used for quantitative real-time PCR

|                              |                                                                                                                                                                                          |
|------------------------------|------------------------------------------------------------------------------------------------------------------------------------------------------------------------------------------|
| <i>TROP2</i>                 | <i>Forward 5'-CCCCGCGCCTCATCCGCCGCGTC-3'</i><br><i>Reverse 5'-CAAGCTCGGTTCTTTCTCAACTC-3'</i>                                                                                             |
| $\beta$ -actin               | <i>Forward 5'-CTGGAACGGTGAAGGTGACA-3'</i><br><i>Reverse 5'-AAGGGACTTCCTGTAAACAATGCA-3'</i>                                                                                               |
| Primer pairs used for RT-PCR |                                                                                                                                                                                          |
| <i>TROP2</i>                 | <i>Forward 5'-TATTACCTGGACGAGATTCCCC3'</i><br><i>Reverse 5'-CCCCGACTTTCTCCGGTTG-3'</i>                                                                                                   |
| $\beta$ -actin               | <i>Forward 5'-GAGACCTTCAACACCCCAGCC-3'</i><br><i>Reverse 5'-AGACGCAGGATGGCATGGG-3'</i>                                                                                                   |
| shRNA                        |                                                                                                                                                                                          |
| Human gene                   | Sequence                                                                                                                                                                                 |
| shTROP2                      | <i>Forward</i><br><i>5'-CACCGCCACCAACAAGATGACCGTTTCAAGACGACGGTCATCTTGTTGGTGGTTTTTTG-3'</i><br><i>Reverse</i><br><i>5'-AGCTCAAAAAACCACCAACAAGATGACCGTCGTCTTGAAACGGTCATCTTGTTGGTGGC-3'</i> |
| shTROP2-2                    | <i>Forward</i><br><i>5'-CACCAGGGCGAGTCTCTATTCCATTCAAGACGTGGAATAGAGACTCGCCCTTTTTTTG-3'</i><br><i>Reverse</i><br><i>5'-AGCTCAAAAAAGGGCGAGTCTCTATTCCACGTCTTGAAATGGAATAGAGACTCGCCCT-3'</i>   |
| shTROP2-3                    | <i>Forward</i><br><i>5'-CACCGCACGCTCATCTATTACCTTTCAAGACGAGGTAATAGATGAGCGTGCTTTTTTTG-3'</i><br><i>Reverse</i><br><i>5'-AGCTCAAAAAAGCACGCTCATCTATTACCTCGTCTTGAAAGGTAATAGATGAGCGTGC-3'</i>  |
| Scramble                     | <i>Forward</i><br><i>5'-CACCGCACCTTTCAGCGTGCGGTAATACGCTCATCTATTAGACGAAGATGATTTTTTTG-3'</i><br><i>Reverse</i><br><i>5'-AGCTCAAAAAATTAATGAGCGTAATAGAAAAAGCACGCTCCTCGTCTTGAAAGGTGC-3'</i>   |
